# Supplementary material for: Controlled nitrite anion encapsulation and release in the molecular cavity of decamethylcucurbit[5]uril: solution and solid state studies
Source: Royal Society of Chemistry journal article supplement (doi:10.1039/c8qi01168k), 2018-11-23
Supplement: c8qi01168k1.pdf [file c8qi01168k1.pdf]

**Supporting information**

**for**

**Controlled nitrite anion encapsulation and release in molecular cavity of  
decamethylcucurbit[5]uril: Solution and solid state studies**

Jing–Xiang Lin <sup>a,b</sup>, Yu–Xi Chen <sup>b</sup>, Dan Zhao <sup>b</sup>, Yu Chen <sup>b</sup>, Xiu–Qiang Lu <sup>b</sup>, Jian Lü<sup>c,d\*</sup> and Rong  
Cao<sup>a,\*</sup>

<sup>a</sup> *State Key Laboratory of Structural Chemistry, Fujian Institute of Research on the Structure of  
Matter, Chinese Academy of Sciences, Fuzhou 350002, P.R. China;*

<sup>b</sup> *The School of Ocean Science and Biochemistry Engineering, Fuqing Branch of Fujian Normal  
University; Fuqing 350300, P.R. China;*

<sup>c</sup>*Fujian Provincial Key Laboratory of Soil Environmental Health and Regulation, College of  
Resources and Environment, Fujian Agriculture and Forestry University, Fuzhou 350002, P.R.  
China;*

<sup>d</sup>*Samara Center for Theoretical Materials Science (SCTMS), Samara State Technical University,  
Molodogvar-deyskaya St. 244, Samara 443100, Russia.*

\*Corresponding authors: jian\_lu\_fafu@163.com (J.L.); rcao@fjirsm.ac.cn (R.C.).

## Chemicals and materials

All chemicals and reagents were purchased from commercial suppliers and used without further purification except for decamethylcucurbit[5]uril ( $\text{Me}_{10}\text{CB}[5]$ ) which was prepared and purified according to the procedure reported in the literature.<sup>S1</sup>

## Characterization methods

Elemental analyses of C, H, and N were carried out on an Elementar Vario EL III analyzer. Infrared (IR) spectra were recorded using KBr pellets on a PerkinElmer Spectrum One in the range 400–4000  $\text{cm}^{-1}$ . Thermal gravimetric analyses (TGA) were performed under a flow of  $\text{N}_2$  ( $100 \text{ mL} \cdot \text{min}^{-1}$ ) with a heating rate of  $10 \text{ }^\circ\text{C} \cdot \text{min}^{-1}$  using a TA SDT–600 thermogravimetric analyzer. Aluminum oxide crucibles were used for all samples, and the instrument was calibrated using indium as standard. An empty crucible was used as reference. Miniflex600 powder X-ray diffractometer (PXRD) was employed for all measurements with experimental parameters as follows: room temperature, Cu–K $\alpha$  radiation ( $\lambda = 1.54056 \text{ \AA}$ ),  $2\theta$  range  $5\text{--}30^\circ$ , Step size  $0.02^\circ$  (scanning rate with  $2\theta$  in  $1^\circ \cdot \text{min}^{-1}$ ). Mass spectroscopy analysis was performed on a Bruker Impact II UHR–TOF mass spectroscopy. A water solution containing 1:10 equivalent of  $\text{Me}_{10}\text{Q}[5]$  and sodium nitrite about 1 mM were electrosprayed and  $m/z$  of cationic species was recorded.

## Synthesis of $[\text{Na}_2(\text{H}_2\text{O})_2(\text{NO}_2@\text{Me}_{10}\text{CB}[5])]^+ \cdot \text{NO}_2^- \cdot 14.75\text{H}_2\text{O}$ (Compound 1):

$\text{Me}_{10}\text{CB}[5]$  (198 mg, 0.2 mmol) was dissolved in 10 ml distilled water, and  $\text{NaNO}_2$  (138 mg, 2.0 mmol) was then added. After sonication and magnetic stirring, the clear solution, with pH value of

7.0, was allowed to evaporate slowly at room temperature. Colorless crystals of compound **1** were obtained after three days. Anal. Calcd for  $C_{40}H_{83.5}N_{22}Na_2O_{30.75}$  (%) (M = 1410.60): C, 34.14; H, 5.90; N, 21.90. Found (%): C, 34.67; H, 5.42; N, 22.26. IR (KBr,  $cm^{-1}$ ):  $\nu$  = 3450 (br,  $\nu_{H_2O}$ ), 2995 (w,  $\nu_{CH_3}$ ), 1741 [vs,  $\nu(C=O)$ ], red shift compared to  $\nu(C=O)$  on pure Me<sub>10</sub>CB[5] at 1752], 1635 (w,  $\delta_{H_2O}$ ), 1477 (vs,  $\delta_{CH_2}$ ), 1406 (s), 1373 (m,  $\delta_{CH_3}$ ), 1309 (s), 1267 (m,  $NO_2^-$ ), 1197 (m, asymmetric stretching of C-N), 1164 (w, symmetric stretching of C-N), 1072 (vs), 964 (w, stretching of C-C), 912 (m), 877 (s), 833 (s,  $NO_2^-$ ), 759 (s, out-of-plane deformation of glycoluril ring), 721 (m), 699 (s, out-of-plane deformation of glycoluril ring). Crystallographic data of **1**: Monoclinic, space group  $P_2/n$ ;  $a=10.9837(1)$  Å,  $b=14.5848(1)$  Å,  $c=19.3219(3)$  Å,  $\beta=99.214(1)^\circ$ ;  $V=3055.32(6)$  Å<sup>3</sup>,  $Z=2$ , GOOF=1.040. Total 29606 reflections measured ( $7.64^\circ \leq 2\theta \leq 146.82^\circ$ ), 6097 unique ( $R_{int} = 0.0231$ ,  $R_{sigma} = 0.0155$ ) which were used in all calculations. The final  $R_1$  was 0.0766 (all data)) and  $wR_2$  was 0.2049 (all data).

### Synthesis of $\{Na_2(H_2O)_{10}, CB[6]\}^{2+} \cdot 3(H_2O) \cdot 2(NO_2)^-$ , (compound **2**)

CB[6] (200 mg, ~0.2 mmol) was dissolved in 10 ml distilled water, and NaNO<sub>2</sub> (138 mg, 2.0 mmol) was then added. After sonication and magnetic stirring, clear up-layer solution was moved to glass vial and was allowed to evaporate slowly at room temperature. Colorless crystals of compound **2** were obtained after two weeks. Crystallographic data of **2**: Orthorhombic, space group  $Pna2_1$ ;  $a=31.578(5)$  Å,  $b=14.455(2)$  Å,  $c=12.0570(17)$  Å,  $V=5503.5(13)$  Å<sup>3</sup>,  $Z=4$ , GOOF=1.0458. Total 29673 reflections measured ( $5.60^\circ \leq 2\theta \leq 136.74^\circ$ ), 9189 unique ( $R_{int} = 0.0593$ ,  $R_{sigma} = 0.0562$ ) which were used in all calculations. The final  $R_1$  was 0.1169 (all data)) and  $wR_2$  was 0.3177 (all data).

### Crystallography

A crystal of compounds suitable for single crystal X-ray diffraction analysis was selected using a polarized light optical microscope. X-ray diffraction data was collected on an Agilent SuperNova diffractometer using Cu-K $\alpha$  radiation ( $\lambda = 1.54184 \text{ \AA}$ ). Using Olex2,<sup>S2</sup> the structure was solved with the olex2.solve structure solution program using Charge Flipping solution method and refined with the olex2.refine refinement package using Gauss-Newton minimisation method.<sup>S3</sup> All non-hydrogen atoms except some disordered atoms were refined anisotropically. Hydrogen atoms on Me<sub>10</sub>CB[5] or CB[6] were placed in geometrically calculated positions and included in the refinement process using a riding model. CIF files containing crystallographic data (CCDC 1554723 for compound 1, CCDC1845091 for compound 2) can be obtained free of charge from Cambridge Crystallographic Data Centre via [www.ccdc.cam.ac.uk/data\\_request/cif](http://www.ccdc.cam.ac.uk/data_request/cif).

### **PXRD characterization of compound 1**

Phase purity of compound **1** was identified by powder X-ray diffraction (PXRD) study. The experimental PXRD pattern matches well with the one simulated from single crystal data of compound **1**, indicating the purity of bulk product.

### **Thermal stability of compound 1**

Thermal stability of compound **1** was studied by thermal analysis in the temperature range of 30–600 °C. The TG curve showed that there are two major weight loss stages. The first weight loss occurred at 30-150 °C, which can be attributed to the release of H<sub>2</sub>O molecules. The second weight loss around 430 °C can be assigned to the decomposition of the Me<sub>10</sub>Q[5] host.

**Table S1** Peaks found in mass spectra of Me<sub>10</sub>CB[5]-NaNO<sub>2</sub>, Me<sub>10</sub>CB[5]-NaNO<sub>2</sub> after decomposition, CB[5]-NaNO<sub>2</sub> and CB[6]-NaNO<sub>2</sub> in water, and their proposed corresponding cationic species.

| Sample                                                       | m/z     | intensity | Proposed cationic species                                                                                                |
|--------------------------------------------------------------|---------|-----------|--------------------------------------------------------------------------------------------------------------------------|
| Me <sub>10</sub> CB[5]-NaNO <sub>2</sub>                     | 1062.35 | high      | {2Na <sup>+</sup> +NO <sub>2</sub> <sup>-</sup> +Me <sub>10</sub> CB[5]} <sup>+</sup>                                    |
|                                                              | 1034.40 | low       | {2Na <sup>+</sup> +OH <sup>-</sup> +Me <sub>10</sub> CB[5]} <sup>+</sup>                                                 |
| Me <sub>10</sub> CB[5]-NaNO <sub>2</sub> after decomposition | 988.43  | low       | {H <sub>3</sub> O <sup>+</sup> +Me <sub>10</sub> CB[5]} <sup>+</sup>                                                     |
|                                                              | 993.38  | low       | {Na <sup>+</sup> +Me <sub>10</sub> CB[5]} <sup>+</sup>                                                                   |
|                                                              | 1034.41 | low       | {2Na <sup>+</sup> +OH <sup>-</sup> +Me <sub>10</sub> CB[5]} <sup>+</sup>                                                 |
|                                                              | 503.23  | high      | {2H <sub>3</sub> O <sup>+</sup> +Me <sub>10</sub> CB[5]} <sup>2+</sup>                                                   |
|                                                              | 563.15  | medium    | {2Na <sup>+</sup> +K <sup>+</sup> +Cl <sup>-</sup> +2H <sub>2</sub> O+Me <sub>10</sub> CB[5]} <sup>2+</sup>              |
|                                                              | 572.16  | high      | {2Na <sup>+</sup> +K <sup>+</sup> +Cl <sup>-</sup> +3H <sub>2</sub> O+Me <sub>10</sub> CB[5]} <sup>2+</sup>              |
|                                                              | 577.15  | medium    | {2Na <sup>+</sup> +K <sup>+</sup> +NO <sub>3</sub> <sup>-</sup> +2H <sub>2</sub> O+Me <sub>10</sub> CB[5]} <sup>2+</sup> |
| CB[5]-NaNO <sub>2</sub>                                      | 911.19  | high      | {2Na <sup>+</sup> +Cl <sup>-</sup> +CB[5]} <sup>+</sup>                                                                  |
|                                                              | 913.19  | medium    | {2H <sub>3</sub> O <sup>+</sup> +NO <sub>2</sub> <sup>-</sup> +CB[5]} <sup>+</sup>                                       |
|                                                              | 438.11  | medium    | {2Na <sup>+</sup> +CB[5]} <sup>2+</sup>                                                                                  |
|                                                              | 922.21  | low       | {2Na <sup>+</sup> +NO <sub>2</sub> <sup>-</sup> +CB[5]} <sup>+</sup>                                                     |
|                                                              | 927.16  | low       | {Na <sup>+</sup> +K <sup>+</sup> +Cl <sup>-</sup> +CB[5]} <sup>+</sup>                                                   |
| CB[6]-NaNO <sub>2</sub>                                      | 539.14  | high      | {2Na <sup>+</sup> +2H <sub>2</sub> O+CB[6]} <sup>2+</sup>                                                                |
|                                                              | 1013.31 | low       | {H <sub>3</sub> O <sup>+</sup> +CB[6]} <sup>+</sup>                                                                      |
|                                                              | 1037.29 | low       | {Na <sup>+</sup> +H <sub>2</sub> O+CB[6]} <sup>+</sup>                                                                   |
|                                                              | 1088.26 | low       | {2Na <sup>+</sup> +NO <sub>2</sub> <sup>-</sup> +CB[6]} <sup>+</sup>                                                     |
|                                                              | 1106.27 | low       | {2Na <sup>+</sup> +NO <sub>2</sub> <sup>-</sup> +H <sub>2</sub> O+CB[6]} <sup>+</sup>                                    |
|                                                              | 1156.25 | low       | {3Na <sup>+</sup> +2NO <sub>2</sub> <sup>-</sup> +CB[6]} <sup>+</sup>                                                    |
|                                                              | 1174.25 | low       | {3Na <sup>+</sup> +2NO <sub>2</sub> <sup>-</sup> +H <sub>2</sub> O+CB[6]} <sup>+</sup>                                   |

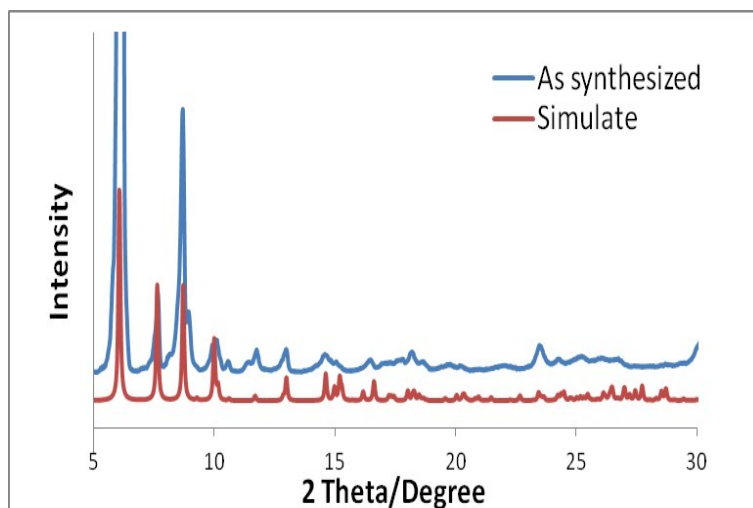

**Fig. S1** Simulated and experimental PXRD of compound 1.

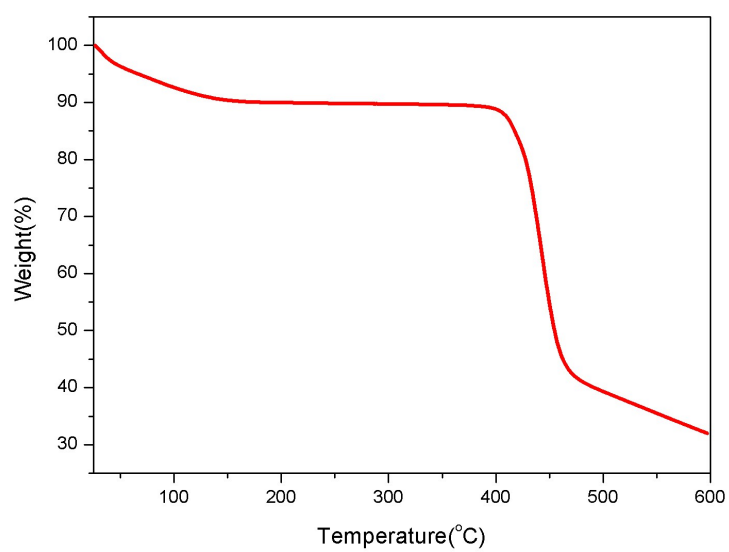

**Fig. S2** TG curve of compound 1.

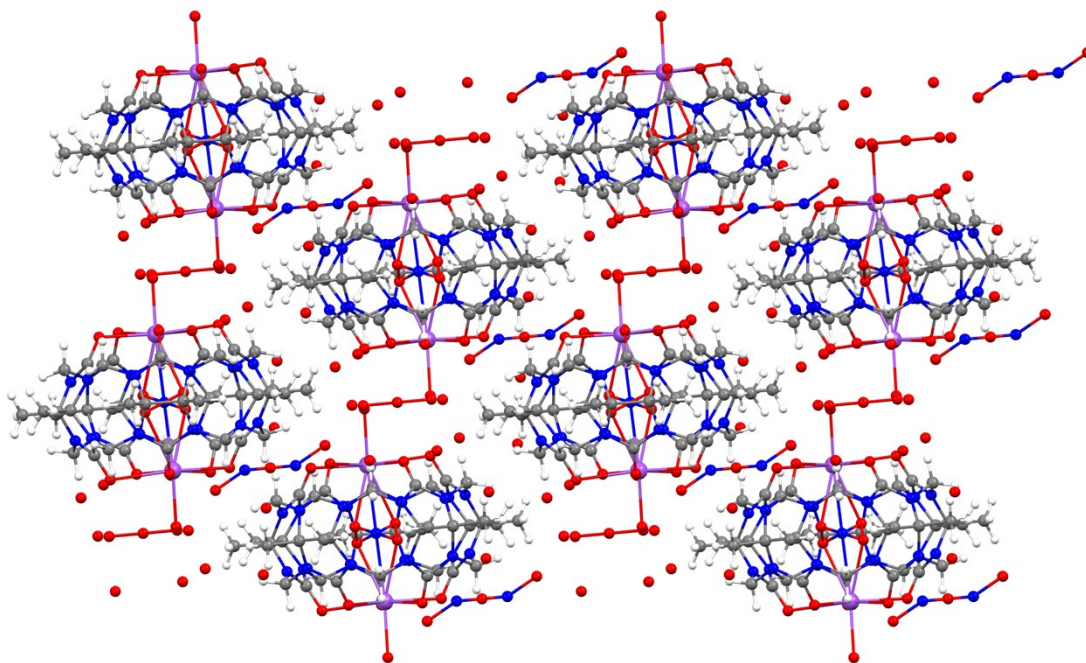

**Fig. S3** A view of the 3 D packing diagram of compound **1** along the *b* axis.

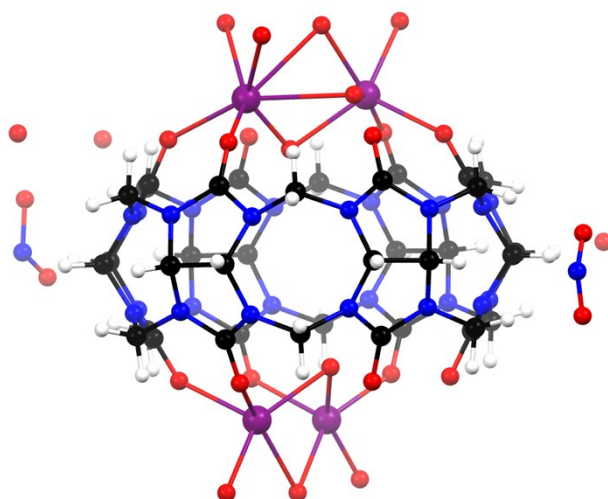

**Fig. S4** The basic building unit in compound **2**

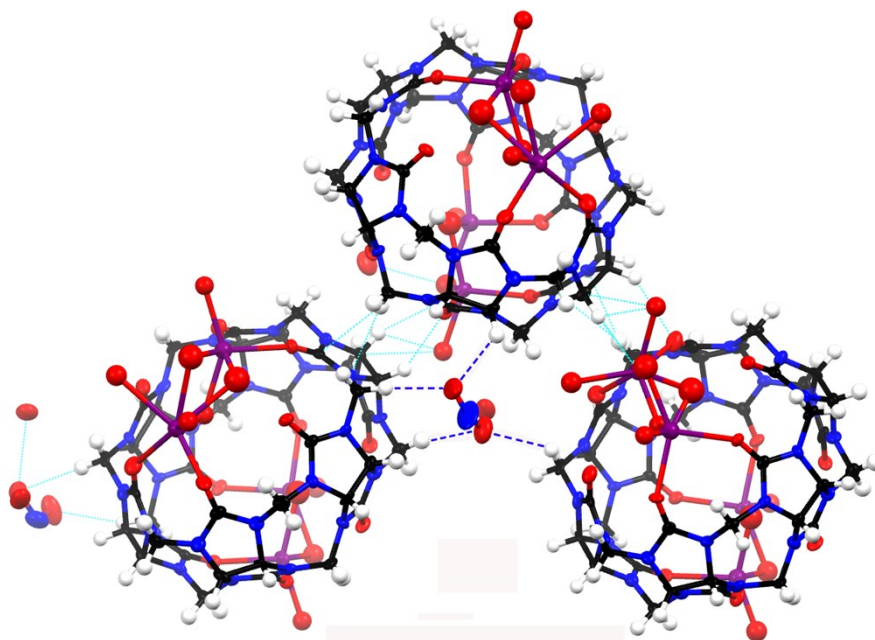

**Fig. S5** Dashed blue lines show the noncovalent bonds formed between oxygen atoms of nitrite ion and hydrogen atoms of methylene and methine groups of CB[6] in compound **2**, with bond distances range from 2.461 Å to 2.532 Å.

## References

- (S1) A. Flinn, G. C. Hough, J. F. Stoddart and D. J. Williams, *Angew. Chem., Int. Ed. Engl.*, 1992, **31**, 1475–1477.
- (S2) O. V. Dolomanov, L. J. Bourhis, R. J. Gildea, J. A. K. Howard and H. Puschmann, *J. Appl. Cryst.*, 2009, **42**, 339–341.
- (S3) L. J. Bourhis, O. V. Dolomanov, R. J. Gildea, J. A. K. Howard and H. Puschmann, *Acta Cryst.*, 2015, **A71**, 59–75.
